# Supplementary material
Source: HighWire-hosted journal article supplement (https://jnm.snmjournals.org/highwire/filestream/94481/field_highwire_adjunct_files/0/119800_Supplemental_Data.pdf)
Supplement: 119800_Supplemental_Data.pdf [file 119800_Supplemental_Data.pdf]

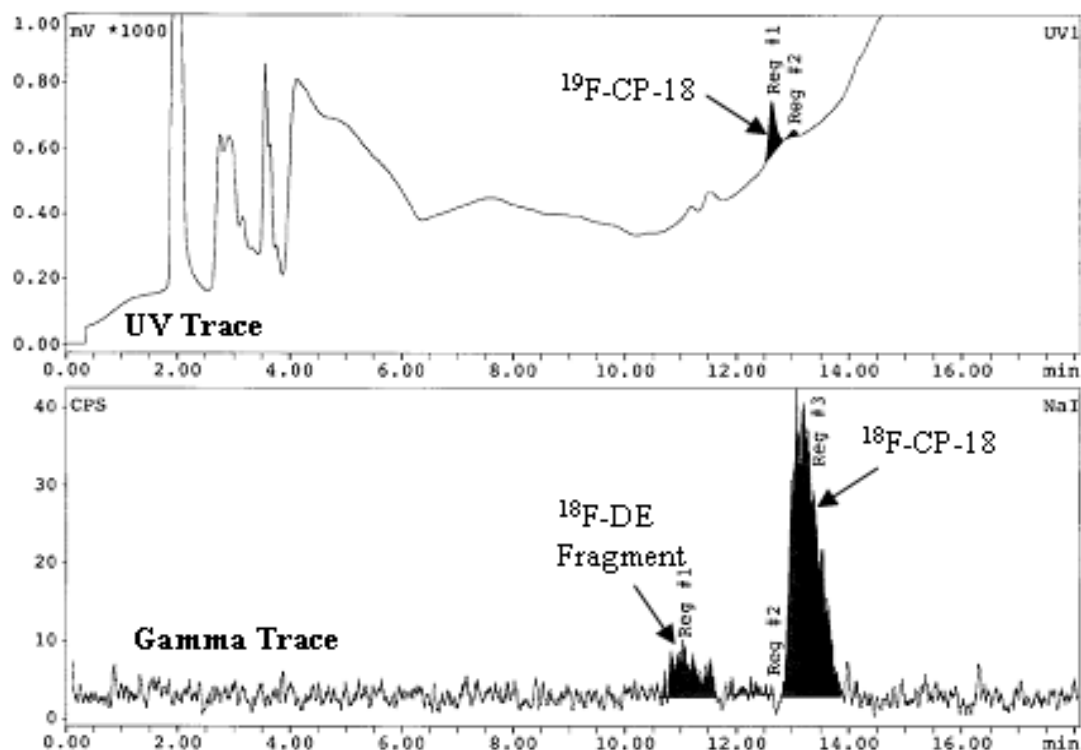

Supplemental Figure 1. A representative radioHPLC analysis of a human plasma sample at 35 minutes post-injection. The UV signal of non-radioactive CP18 (upper trace) overlaps with the predominant radioactive signal in the gamma trace (lower trace), which is un-metabolized  $^{18}\text{F}$ -CP18. The plasma metabolite observed in the gamma trace is tentatively assigned as the fragment cleaved between “DE” and “VD”.

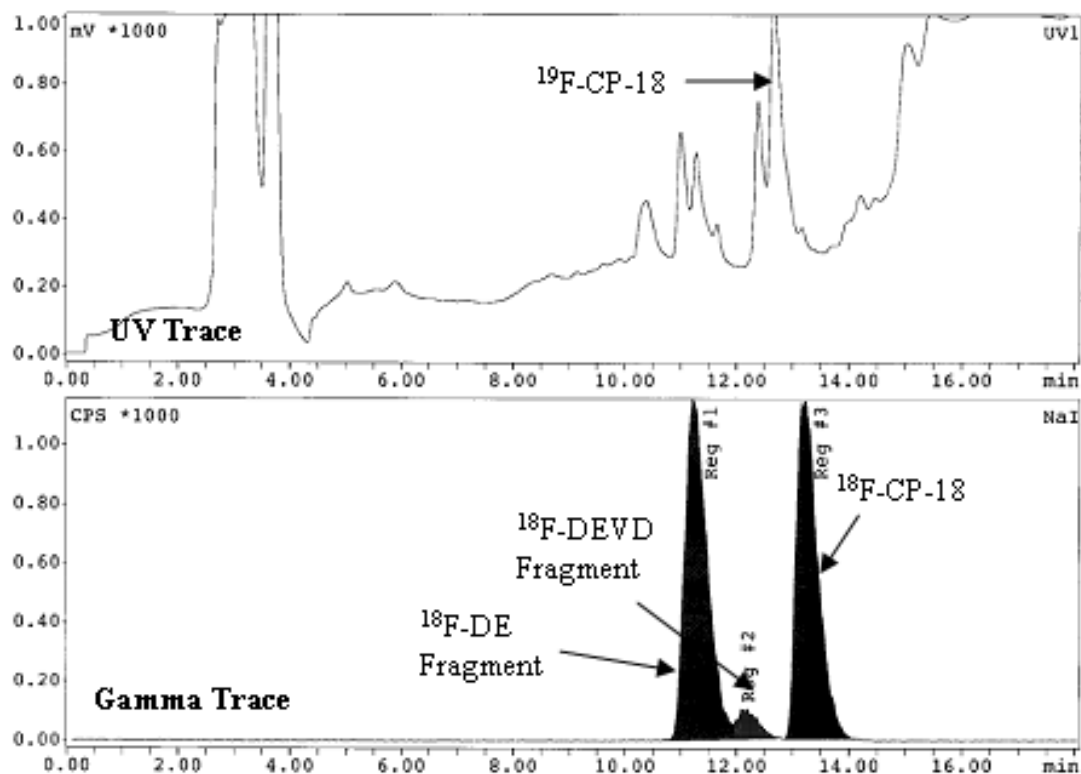

Supplemental Figure 2. A representative radioHPLC analysis of a human urine sample at 35 minutes post-injection. The UV signal of non-radioactive CP18 (upper trace) overlaps with the predominant radioactive signal in the gamma trace (lower trace), which is un-metabolized  $^{18}\text{F}$ -CP18. The plasma metabolites observed in the gamma trace are tentatively assigned as the fragment cleaved between “DE” and “VD” in addition to the parent tracer which as lost the PEG group.
